# Supplementary material for: The first electrocatalytic stereoselective multicomponent synthesis of cyclopropanecarboxylic acid derivatives
Source: Royal Society of Chemistry journal article supplement (doi:10.1039/c5ra19690f), 2015-01-01
Supplement: c5ra19690f1.pdf [file c5ra19690f1.pdf]

**Supporting Information for**

**The first electrocatalytic stereoselective multicomponent synthesis of  
cyclopropanecarboxylic acid derivatives**

Anatoly N. Vereshchagin,<sup>a</sup> Michail N. Elinson<sup>a</sup> and Michail P. Egorov<sup>a</sup>

<sup>a</sup> N. D. Zelinsky Institute of Organic Chemistry, Leninsky pr. 47, Moscow, 119991, Russian Federation. E-mail: [vereshchagin@ioc.ac.ru](mailto:vereshchagin@ioc.ac.ru)

**List of contents**

|                                       |    |
|---------------------------------------|----|
| 1. Chemicals and equipment            | S2 |
| 2. Typical electrolysis procedure     | S2 |
| 3. Large-scale electrolysis procedure | S2 |
| 4. Analytical data                    | S3 |
| 5. References                         | S5 |
| 6. Spectra of the new compounds       | S6 |

## 1. Chemicals and equipment.

All starting materials were obtained from commercial sources and used without further purification.

GLC analyses were carried out on an Agilent 7820A chromatograph with a flame-ionisation detector (column HP-5). All melting points were measured with a Gallenkamp melting point apparatus and are uncorrected.  $^1\text{H}$  and  $^{13}\text{C}$  NMR spectra were recorded with Bruker AM300 spectrometer at ambient temperature. Chemical shifts values are relative to  $\text{Me}_4\text{Si}$  for  $\text{CDCl}_3$  and  $\text{DMSO-d}_6$ . IR spectra were registered with a SPECORD M82 spectrometer in KBr pellets. Massspectra (EI = 70 eV) were obtained directly with a Finningan MAT INCOS 50 spectrometer. High-resolution mass spectrometry (HRMS) (electrospray ionization, ESI) was measured on a Bruker microTOF II instrument; external or internal calibration was done with an Electrospray Calibrant Solution (Fluka).

## 2. Typical electrolysis procedure

A solution of aromatic aldehyde **1** (15 mmol), alkyl cyanoacetate **2** (15 mmol), dialkyl malonate **3** (15 mmol), sodium acetate (5 mmol, 0.41 g) and sodium bromide (5 mmol, 0.51 g) in alcohol (35 mL) was stirred in a 50 ml baker at rt for 30 min. Then the mixture was cooled to 0 °C and electrolyzed (graphite anode and an iron cathode, electrode squares 5 cm<sup>2</sup>) under a constant current density of 100 mA/cm<sup>2</sup> ( $I = 500$  mA) until required quantity of electricity was passed (Table 2). After the electrolysis reaction mixture was concentrated to 20 ml and cooled to -10 °C for 2 h, filtered out and dried under reduced pressure to give pure **4**. Cyclopropane **4b** was isolated as follows: the reaction mixture was concentrated, extracted with chloroform, washed with water, and dried over  $\text{Na}_2\text{SO}_4$ . After evaporation of the chloroform, cyclopropane **4b** was isolated by flash chromatography (eluent chloroform-hexane 1:1).

## 3. Large-scale electrolysis

A solution of benzaldehyde **1a** (50 mmol, 5.30 g), methyl cyanoacetate **2a** (50 mmol, 4.95 g), dimethyl malonate **3a** (50 mmol, 6.60 g), sodium acetate (5 mmol, 0.41 g) and sodium bromide (5 mmol, 0.51 g) in methanol (70 mL) was stirred in a 100 ml baker at rt for 30 min. Then the mixture was cooled to 0 °C and electrolyzed until the quantity of electricity 3.5 F/mol was passed. After the electrolysis reaction mixture was concentrated to 30 ml and cooled to -10 °C for 2 h, filtered out and dried under reduced pressure to give 13.8 g (87%) of pure **4a**.

## 4. Analytical data

**Trimethyl (2*R*\*,3*R*\*)-2-cyanocyclopropane-3-phenyl-1,1,2-tricarboxylate (2a)**; yield 3.80 g

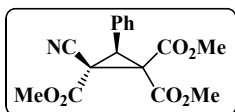

(80%); white solid; m.p. 142 °C (lit.<sup>1</sup> m.p. 140-142 °C); <sup>1</sup>H NMR (300 MHz, CDCl<sub>3</sub>), δ: 3.70 (s, 3H, CH<sub>3</sub>O), 3.76 (s, 3H, CH<sub>3</sub>O), 3.86 (s, 3H, CH<sub>3</sub>O), 3.93 (s, 1H, CH), 7.30-7.44 (m, 5H, Ph).

**Triethyl (2*R*\*,3*R*\*)-2-cyanocyclopropane-3-phenyl-1,1,2-tricarboxylate (4b)**; yield 3.98 g

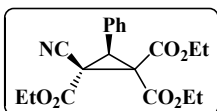

(74%); colourless oil; *n*<sub>D</sub><sup>20</sup> 1.5034 (lit.<sup>2</sup> *n*<sub>D</sub><sup>20</sup> 1.5040); <sup>1</sup>H NMR (300 MHz, CDCl<sub>3</sub>), δ: 1.12 (t, CH<sub>3</sub>, *J* = 7.1 Hz), 1.29 (t, CH<sub>3</sub>, *J* = 7.1 Hz), 1.38 (t, CH<sub>3</sub>, *J* = 7.1 Hz), 3.93 (s, 1H, CH), 4.12 (q, 2H, CH<sub>2</sub>O, *J* = 7.1 Hz), 4.20-4.45 (m, 4H, CH<sub>2</sub>O), 7.25-7.51 (m, 5H, Ph).

**Trimethyl (2*R*\*,3*R*\*)-2-cyanocyclopropane-3-(2-methylphenyl)-1,1,2-tricarboxylate (4c)**;

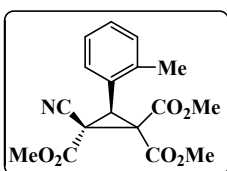

yield 3.57 g (72%); white solid; m.p. 92-93 °C; <sup>1</sup>H NMR (300 MHz, CDCl<sub>3</sub>), δ: 2.37 (s, 3H, CH<sub>3</sub>), 3.70 (s, 3H, CH<sub>3</sub>O), 3.83 (s, 3H, CH<sub>3</sub>O), 3.89 (s, 1H, CH), 3.91 (s, 3H, CH<sub>3</sub>O), 7.15-7.32 (m, 3H, Ar), 7.32-7.40 (m, 1H, Ar); <sup>13</sup>C NMR (75.47 MHz, CDCl<sub>3</sub>), δ: 19.3, 30.9, 39.5, 47.6, 53.5, 53.6,

54.7, 112.7, 126.0, 127.7, 128.1, 128.8, 130.7, 137.8, 163.0, 164.5, 165.1; IR (cm<sup>-1</sup>), *v*: 2250, 1747, 1441, 1272, 1239; MS, *m/z* (%): 313 (M<sup>+</sup>, 14), 300 (3), 272 (83), 240 (21), 212 (100), 196 (13), 184 (27), 153 (31), 127 (48), 59 (94); HRMS *m/z* (ESI) calcd for C<sub>17</sub>H<sub>17</sub>NNaO<sub>6</sub> (M+Na)<sup>+</sup> 354.0948, found 354.0943.

**Trimethyl (2*R*\*,3*R*\*)-2-cyanocyclopropane-3-(3-methylphenyl)-1,1,2-tricarboxylate (4d)**;

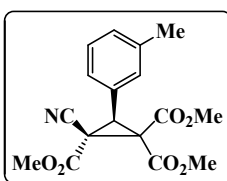

yield 3.72 g (75%); white solid; m.p. 102-103 °C; <sup>1</sup>H NMR (300 MHz, CDCl<sub>3</sub>), δ: 2.34 (s, 3H, CH<sub>3</sub>), 3.72 (s, 3H, CH<sub>3</sub>O), 3.83 (s, 3H, CH<sub>3</sub>O), 3.90 (s, 1H, CH), 3.93 (s, 3H, CH<sub>3</sub>O), 7.10-7.35 (m, 4H, Ar); <sup>13</sup>C NMR (75.47 MHz, CDCl<sub>3</sub>), δ: 20.9, 30.3, 39.3, 47.5, 53.5, 53.6, 54.6, 112.6, 126.0, 127.7,

128.1, 128.7, 130.7, 137.8, 163.0, 164.5, 165.1; IR (cm<sup>-1</sup>), *v*: 2255, 1752, 1432, 1266, 1240; MS, *m/z* (%): 331 (M<sup>+</sup>, 18), 300 (3), 272 (86), 240 (14), 212 (100), 184 (17), 154 (25), 135 (32), 91 (19), 59 (71); HRMS *m/z* (ESI) calcd for C<sub>17</sub>H<sub>17</sub>NNaO<sub>6</sub> (M+Na)<sup>+</sup> 354.0948, found 354.0943.

**Trimethyl (2*R*\*,3*R*\*)-2-cyanocyclopropane-3-(4-methylphenyl)-1,1,2-tricarboxylate (4e)**;

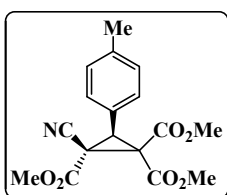

yield 3.87 g (78%); white solid; m.p. 73-74 °C (lit.<sup>1</sup> m.p. 72-74 °C); <sup>1</sup>H NMR (300 MHz, CDCl<sub>3</sub>), δ: 2.34 (s, 3H, CH<sub>3</sub>), 3.72 (s, 3H, CH<sub>3</sub>O), 3.83 (s, 3H, CH<sub>3</sub>O), 3.89 (s, 1H, CH), 3.91 (s, 3H, OCH<sub>3</sub>), 7.18 (d, 2H, *J* = 8.3 Hz), 7.25 (d, 2H, *J* = 8.3 Hz).

**Trimethyl (2*R*\*,3*R*\*)-2-cyanocyclopropane-3-(4-methoxyphenyl)-1,1,2-tricarboxylate (4f);**

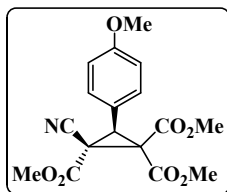

yield 4.42 g (85%); white solid; m.p. 112 °C (lit.<sup>1</sup> m.p. 110-112 °C); <sup>1</sup>H NMR (300 MHz, CDCl<sub>3</sub>), δ: 3.72 (s, 3H, CH<sub>3</sub>O), 3.80 (s, 3H, CH<sub>3</sub>O), 3.82 (s, 3H, CH<sub>3</sub>O), 3.87 (s, 1H, CH), 3.91 (s, 3H, CH<sub>3</sub>O), 6.88 (d, 2H, Ar, *J* = 8.2 Hz), 7.29 (d, 2H, Ar, *J* = 8.2 Hz).

**Trimethyl (2*R*\*,3*R*\*)-2-cyanocyclopropane-3-(4-fluorophenyl)-1,1,2-tricarboxylate (4g);**

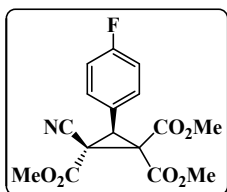

yield 4.12 g (82%); white solid; m.p. 116-117 °C; <sup>1</sup>H NMR (300 MHz, DMSO-d<sub>6</sub>), δ: 3.72 (s, 3H, CH<sub>3</sub>O), 3.75 (s, 3H, CH<sub>3</sub>O), 3.83 (s, 3H, CH<sub>3</sub>O), 3.90 (s, 1H, CH), 7.27 (t, *J* = 8.4 Hz, 2H, Ar), 7.35-7.45 (m, 2H, Ar); <sup>13</sup>C NMR (75.47 MHz, DMSO-d<sub>6</sub>), δ: 30.8, 38.0, 47.1, 53.7, 53.9, 54.5, 112.3, 115.6 (2C, d, <sup>2</sup>*J*<sub>CF</sub> = 21.9 Hz), 125.8 (2C, d, <sup>4</sup>*J*<sub>CF</sub> = 3.3 Hz), 130.9 (2C, d, <sup>3</sup>*J*<sub>CF</sub> = 8.3 Hz), 162.0 (2C, d, <sup>1</sup>*J*<sub>CF</sub> = 244 Hz), 162.5, 163.7, 164.0; IR (cm<sup>-1</sup>), ν: 2252, 1750, 1438, 1272, 1240, 1220; MS, *m/z* (%): 335 (M<sup>+</sup>, 3), 304 (2), 276 (35), 244 (6), 216 (16), 188 (8), 158 (21), 139 (21), 59 (100), 15 (72); HRMS *m/z* (ESI) calcd for C<sub>16</sub>H<sub>14</sub>FNNaO<sub>6</sub> (M+Na)<sup>+</sup> 358.0691, found 358.0697.

**Trimethyl (2*R*\*,3*R*\*)-3-(3-bromophenyl)-2-cyanocyclopropane-1,1,2-tricarboxylate (4h);**

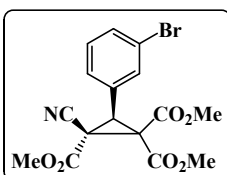

yield 5.17 g (87%); yellowish solid; m.p. 89-90 °C (lit.<sup>1</sup> m.p. 89-91 °C); <sup>1</sup>H NMR (300 MHz, CDCl<sub>3</sub>), δ: 3.73 (s, 3H, CH<sub>3</sub>O), 3.80 (s, 3H, CH<sub>3</sub>O), 3.87 (s, 1H, CH), 3.89 (s, 3H, CH<sub>3</sub>O), 7.20-7.33 (m, 2H, Ar), 7.40-7.50 (m, 2H, Ar).

**Trimethyl (2*R*\*,3*R*\*)-2-cyanocyclopropane-3-(2-nitrophenyl)-1,1,2-tricarboxylate (4i);**

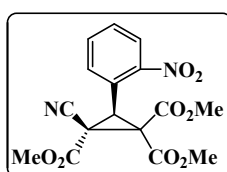

yield 3.53 g (65%); white solid; m.p. 168-170 °C; <sup>1</sup>H NMR (300 MHz, CDCl<sub>3</sub>), δ: 3.74 (s, 3H, CH<sub>3</sub>O), 3.85 (s, 3H, CH<sub>3</sub>O), 3.95 (s, 3H, CH<sub>3</sub>O), 4.28 (s, 1H, CH), 7.48 (d, *J* = 7.6 Hz, 1H, Ar), 7.52-7.74 (m, 2H, Ar), 8.19 (d, *J* = 8.1 Hz, 1H, Ar); <sup>13</sup>C NMR (75.47 MHz, CDCl<sub>3</sub>), δ: 31.6, 38.1, 47.2, 53.8, 54.2, 54.6, 112.0, 124.8, 125.3, 130.4, 132.0, 134.2, 148.4, 162.7, 163.4, 163.8; IR (cm<sup>-1</sup>), ν: 2252, 1744, 1525, 1297, 1244; MS, *m/z* (%): 362 (M<sup>+</sup>, 2), 331 (2), 316 (9), 271 (7), 196 (24), 166 (4), 135 (100), 91 (68), 79 (46), 59 (63); HRMS *m/z* (ESI) calcd for C<sub>16</sub>H<sub>14</sub>N<sub>2</sub>NaO<sub>8</sub> (M+Na)<sup>+</sup> 385.0642, found 385.0641.

**Trimethyl (2*R*\*,3*R*\*)-2-cyanocyclopropane-3-(3-nitrophenyl)-1,1,2-tricarboxylate (4j);**

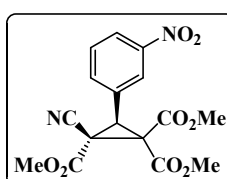

yield 3.64 g (67%); white solid; m.p. 120-122 °C; <sup>1</sup>H NMR (300 MHz, CDCl<sub>3</sub>), δ: 3.78 (s, 3H, CH<sub>3</sub>O), 3.86 (s, 3H, CH<sub>3</sub>O), 3.95 (s, 3H, CH<sub>3</sub>O), 3.99 (s, 1H, CH), 7.55-7.65 (m, 1H, Ar), 7.70-7.80 (m, 1H, Ar), 8.18-8.30 (m, 2H, Ar); <sup>13</sup>C NMR (75.47 MHz, CDCl<sub>3</sub>), δ: 30.7, 38.2, 47.3, 53.9 (2C), 54.8, 111.8,

123.7, 123.9, 130.0, 131.5, 134.9, 148.3, 162.4, 163.7, 164.2; IR (cm<sup>-1</sup>),  $\nu$ : 2259, 1748, 1524, 1266, 1232; MS,  $m/z$  (%): 362 (M<sup>+</sup>, 1), 331 (8), 303 (100), 259 (5), 244 (6), 218 (5), 166 (17), 139 (8), 113 (7), 59 (54); HRMS  $m/z$  (ESI) calcd for C<sub>16</sub>H<sub>14</sub>N<sub>2</sub>NaO<sub>8</sub> (M+Na)<sup>+</sup> 385.0642, found 385.0639.

**Trimethyl (2*R*\*,3*R*\*)-2-cyanocyclopropane-3-(4-nitrophenyl)-1,1,2-tricarboxylate (4k)**; yield

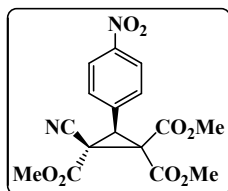

3.48 g (64%); white solid; m.p. 152-154 °C; <sup>1</sup>H NMR (300 MHz, CDCl<sub>3</sub>),  $\delta$ : 3.73 (s, 3H, CH<sub>3</sub>O), 3.83 (s, 3H, CH<sub>3</sub>O), 3.94 (s, 3H, CH<sub>3</sub>O), 3.96 (s, 1H, CH), 7.56 (d,  $J$  = 8.6 Hz, 2H, Ar), 8.24 (d,  $J$  = 8.6 Hz, 2H, Ar); <sup>13</sup>C NMR (75.47 MHz, CDCl<sub>3</sub>),  $\delta$ : 30.7, 38.5, 47.4, 53.9 (2C), 54.9, 111.9, 123.9 (2C), 129.9, 136.7 (2C), 136.7, 162.4, 163.7, 164.3; IR (cm<sup>-1</sup>),  $\nu$ : 2255, 1748, 1524, 1269, 1240, 1237; MS,  $m/z$  (%): 362 (M<sup>+</sup>, 2), 331 (7), 303 (100), 270 (3), 243 (11), 218 (5), 166 (12), 127 (9), 101 (5), 59 (52); HRMS  $m/z$  (ESI) calcd for C<sub>16</sub>H<sub>14</sub>N<sub>2</sub>NaO<sub>8</sub> (M+Na)<sup>+</sup> 385.0642, found 385.0636.

**Trimethyl (2*R*\*,3*R*\*)-2-cyanocyclopropane-3-(4-nitrophenyl)-1,1,2-tricarboxylate (4l)**; yield

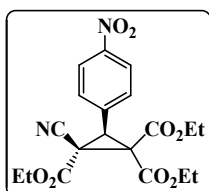

4.00 g (66%); yellowish solid; m.p. 122-123 °C (lit.<sup>2</sup> m.p. 123-124 °C); <sup>1</sup>H NMR (300 MHz, CDCl<sub>3</sub>),  $\delta$ : 1.18 (t,  $J$  = 7.1 Hz, 3H, CH<sub>3</sub>), 1.32 (t,  $J$  = 7.1 Hz, 3H, CH<sub>3</sub>), 1.40 (t,  $J$  = 7.1 Hz, 3H, CH<sub>3</sub>), 3.97 (s, 1H, CH), 4.20 (q,  $J$  = 7.1 Hz, 2H, CH<sub>2</sub>O), 4.29 (q,  $J$  = 7.1 Hz, 2H, CH<sub>2</sub>O), 4.37 (q,  $J$  = 7.1 Hz, 2H, CH<sub>2</sub>O), 7.58 (d,  $J$  = 8.6 Hz, 2H, Ar), 8.26 (d,  $J$  = 8.6 Hz, 2H, Ar).

**Trimethyl (2*R*,3*R*)-2-cyano-3-pyridin-3-ylcyclopropane-1,1,2-tricarboxylate (4m)**; yield

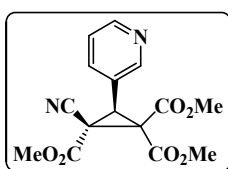

2.48 g (52%); yellow solid; m.p. 123-124 °C; <sup>1</sup>H NMR (300 MHz, CDCl<sub>3</sub>),  $\delta$ : 3.74 (s, 3H, CH<sub>3</sub>O), 3.86 (s, 3H, CH<sub>3</sub>O), 3.90 (s, 1H, CH), 3.95 (s, 3H, CH<sub>3</sub>O), 7.26-7.38 (m, 1H, Ar), 7.70-7.80 (m, 1H, Ar), 8.54-8.64 (m, 2H, Ar); <sup>13</sup>C NMR (75.47 MHz, CDCl<sub>3</sub>),  $\delta$ : 30.7, 38.4, 46.7, 53.8, 54.0, 54.6, 112.2, 123.5, 126.0, 136.4, 149.5, 149.7, 162.5, 163.5, 163.9; IR (cm<sup>-1</sup>),  $\nu$ : 2247, 1754, 1435, 1260, 1236; MS,  $m/z$  (%): 318 (M<sup>+</sup>, 4), 287 (8), 259 (100), 215 (6), 200 (15), 183 (13), 156 (10), 141 (12), 122 (26), 59 (90); HRMS  $m/z$  (ESI) calcd for C<sub>15</sub>H<sub>14</sub>N<sub>2</sub>NaO<sub>6</sub> (M+Na)<sup>+</sup> 341.0744, found 341.0746.

## 5. References

- 1 M. N. Elinson, S. K. Feducovich, Z. A. Starikova, A. N. Vereshchagin, P. A. Belyakov, G. I. Nikishin, *Tetrahedron*, 2006, **62**, 3989.
- 2 G. V. Kryshstal, G. M. Zhbankina, S. G. Zlotin, *Russ. Chem. Bull.*, 2011, **60**, 2286.

## 6. Spectra of the new compounds

$^1\text{H}$  NMR for **4c**

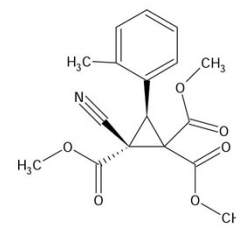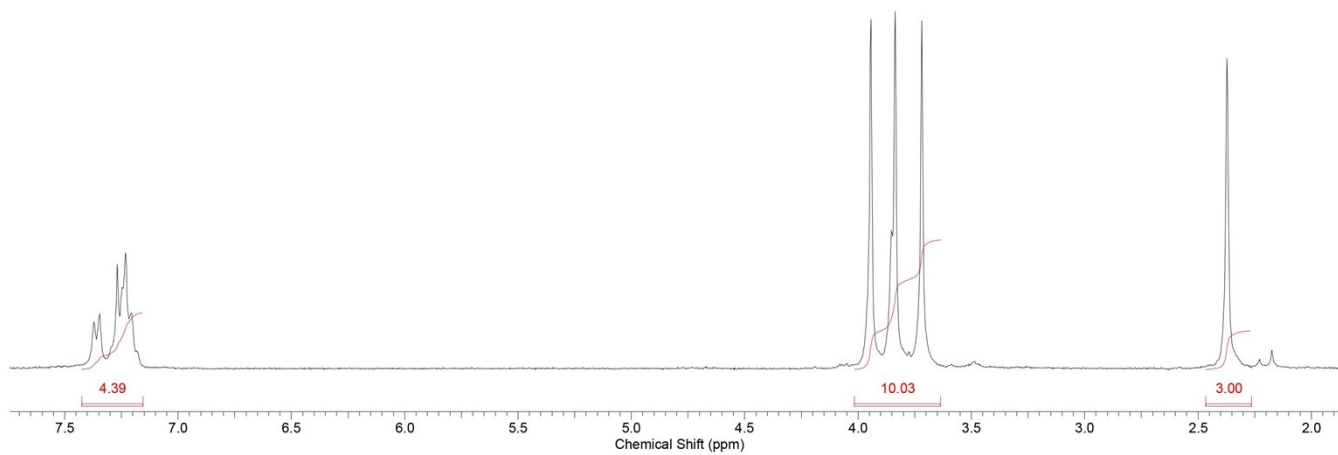

$^{13}\text{C}$  NMR for **4c**

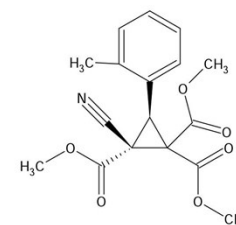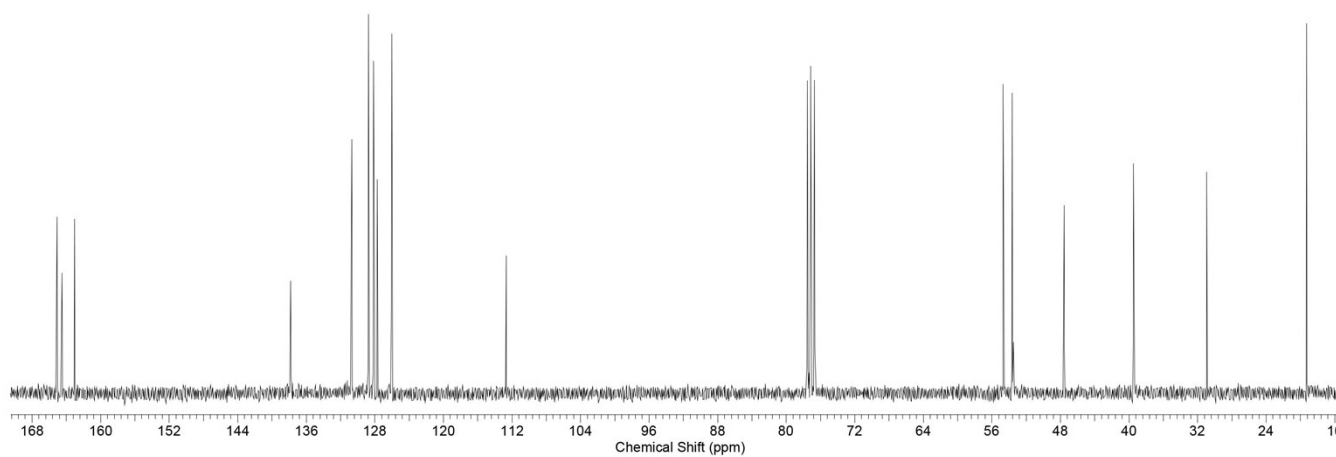

| No. | (ppm)  | Height | No. | (ppm)  | Height |
|-----|--------|--------|-----|--------|--------|
| 1   | 19.28  | 0.9764 | 10  | 127.70 | 0.5661 |
| 2   | 30.93  | 0.5862 | 11  | 128.14 | 0.8772 |
| 3   | 39.49  | 0.6076 | 12  | 128.75 | 1.0000 |
| 4   | 47.57  | 0.4978 | 13  | 130.67 | 0.6713 |
| 5   | 53.54  | 0.5754 | 14  | 137.81 | 0.2991 |
| 6   | 53.64  | 0.7935 | 15  | 163.03 | 0.4619 |
| 7   | 54.68  | 0.8158 | 16  | 164.50 | 0.3207 |
| 8   | 112.67 | 0.3651 | 17  | 165.07 | 0.4675 |
| 9   | 126.04 | 0.9488 |     |        |        |

# <sup>1</sup>H NMR for 4d

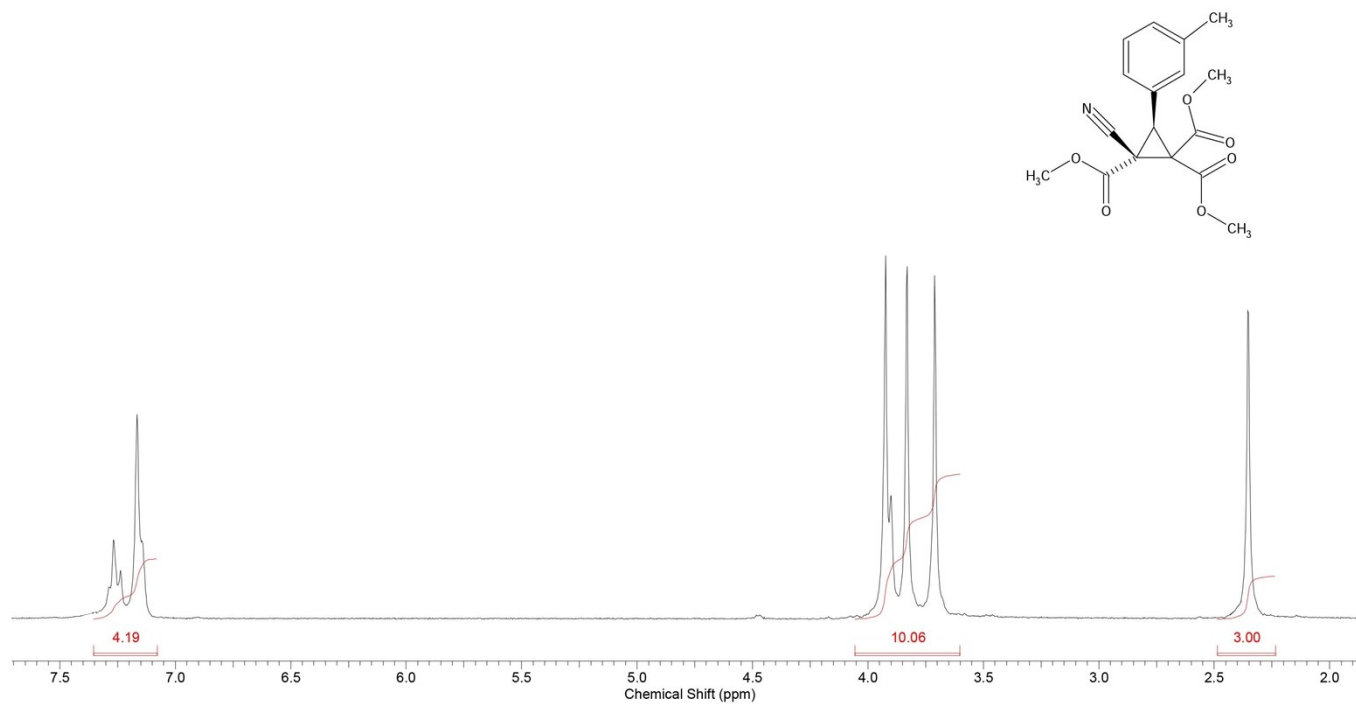

# <sup>13</sup>C NMR for 4d

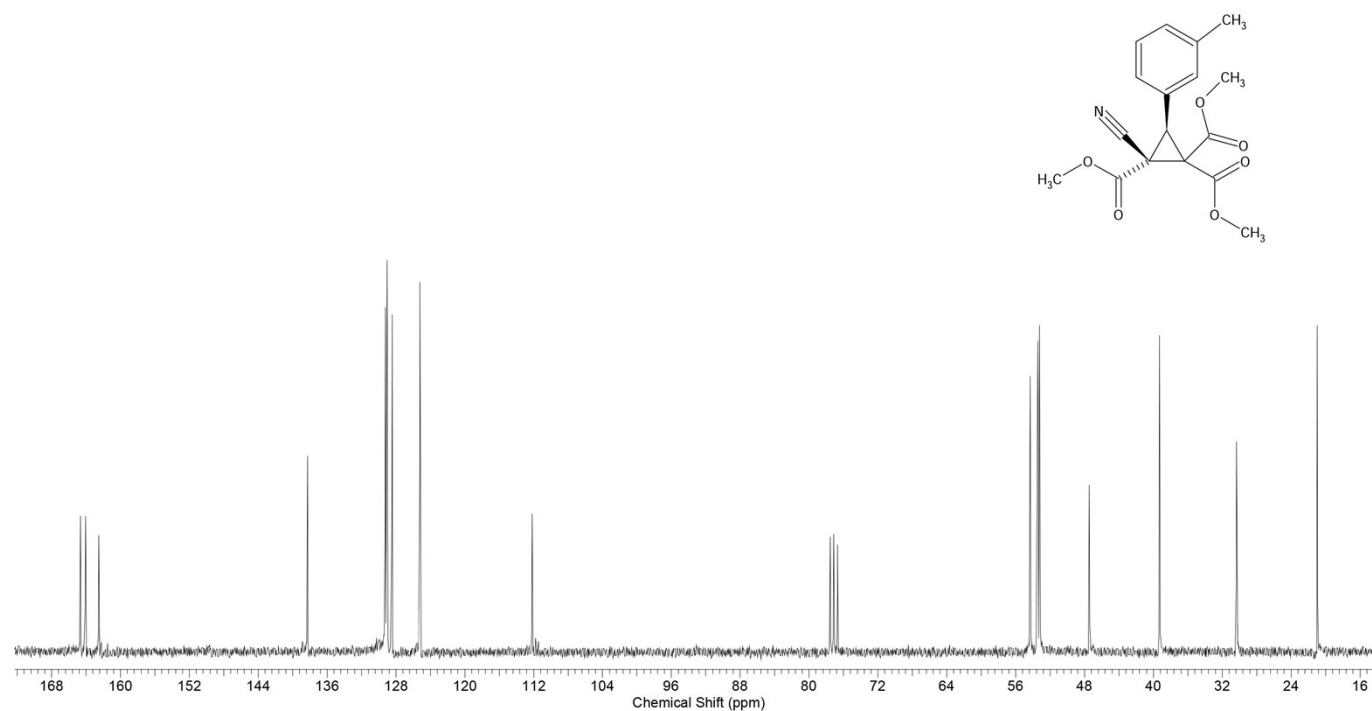

# <sup>1</sup>H NMR for 4g

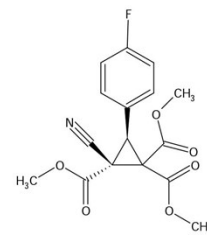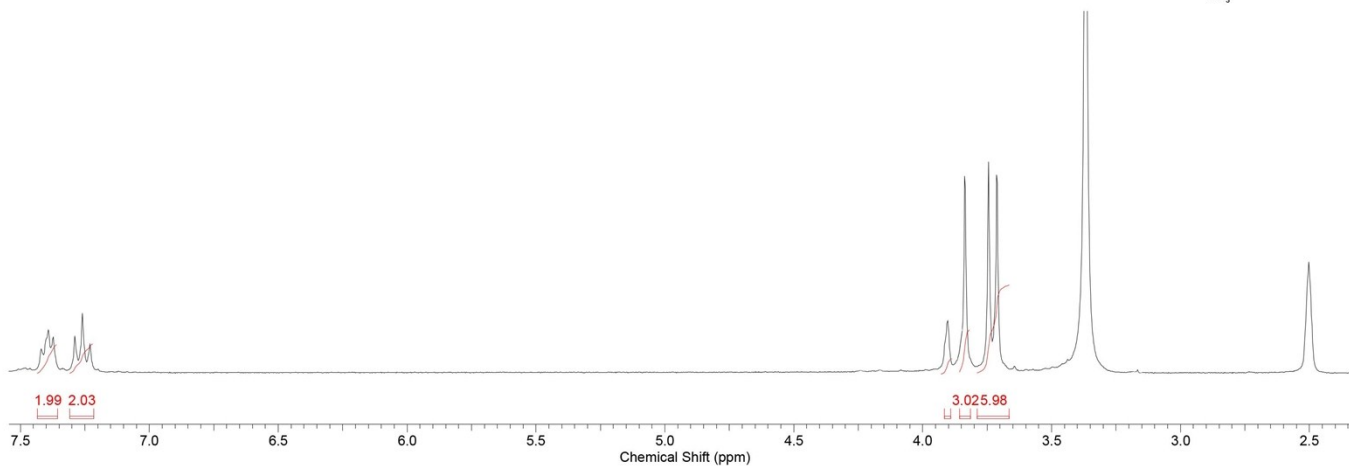

# <sup>13</sup>C NMR for 4g

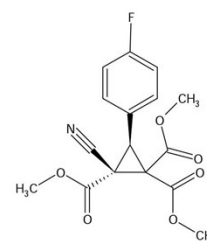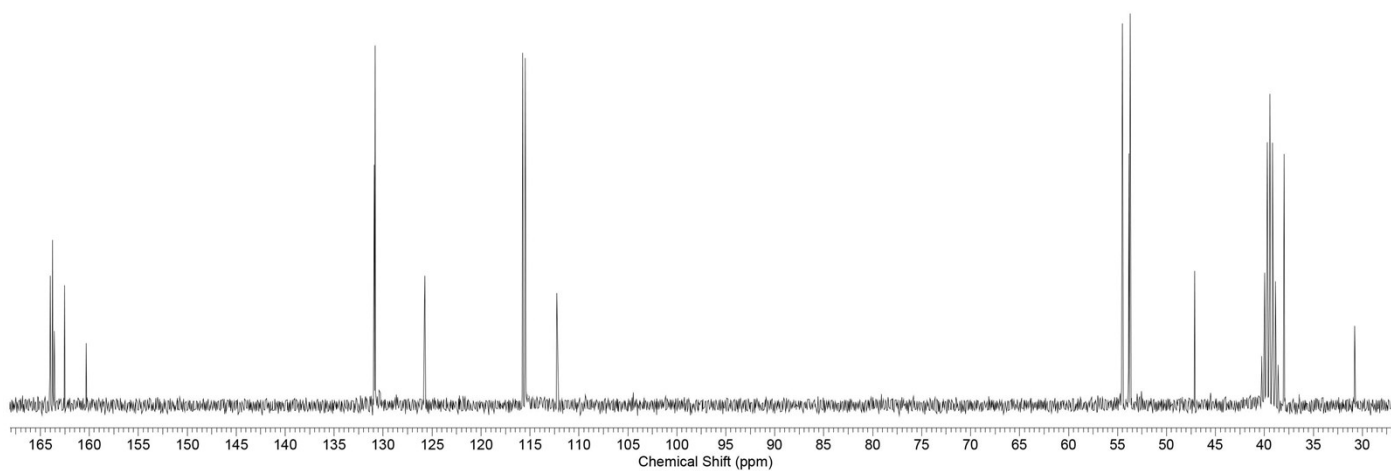

| No. | (ppm)  | Height | No. | (ppm)  | Height |
|-----|--------|--------|-----|--------|--------|
| 1   | 30.80  | 0.2032 | 10  | 125.73 | 0.3320 |
| 2   | 38.01  | 0.6423 | 11  | 125.78 | 0.2404 |
| 3   | 47.12  | 0.3439 | 12  | 130.81 | 0.9192 |
| 4   | 53.89  | 1.0000 | 13  | 130.92 | 0.6150 |
| 5   | 53.85  | 0.6437 | 14  | 160.34 | 0.1600 |
| 6   | 54.50  | 0.9752 | 15  | 162.50 | 0.3074 |
| 7   | 112.26 | 0.2872 | 16  | 163.59 | 0.1902 |
| 8   | 115.48 | 0.8865 | 17  | 163.74 | 0.4232 |
| 9   | 115.77 | 0.8998 | 18  | 164.00 | 0.3319 |



# <sup>1</sup>H NMR for 4i

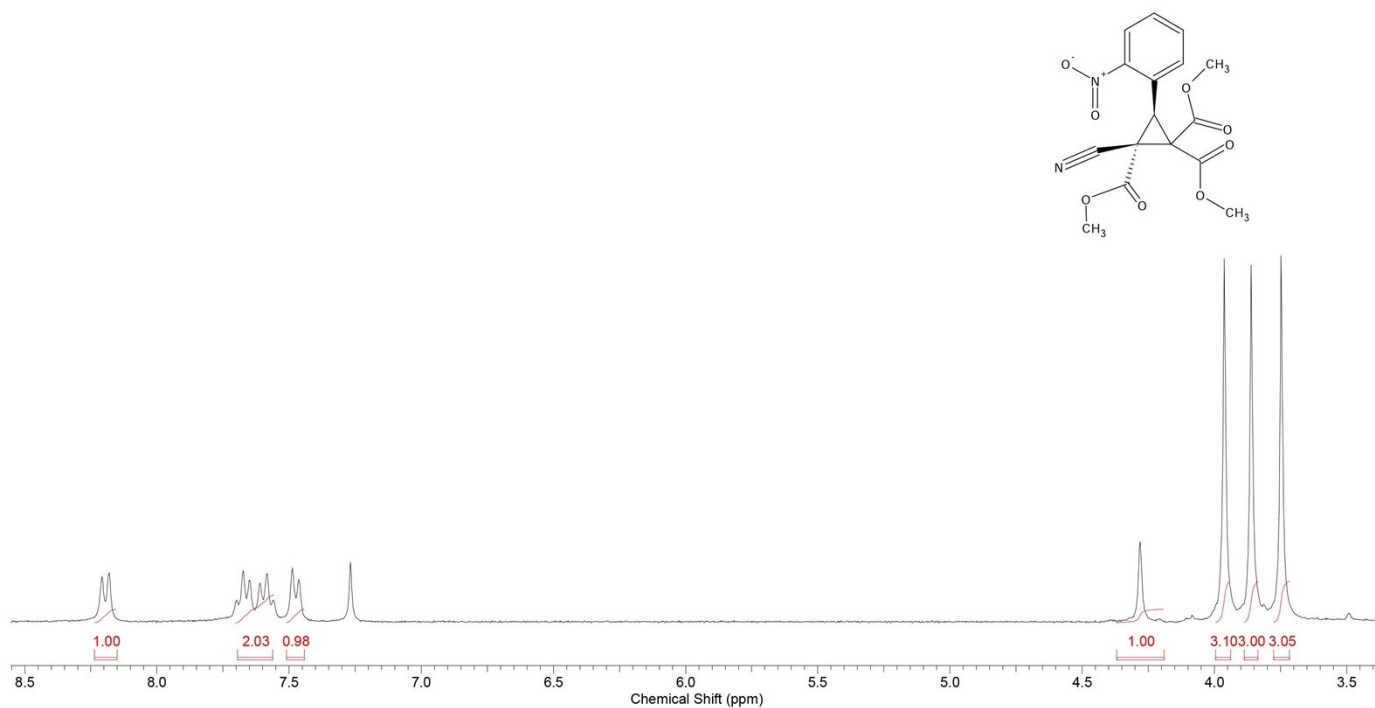

# <sup>13</sup>C NMR for 4i

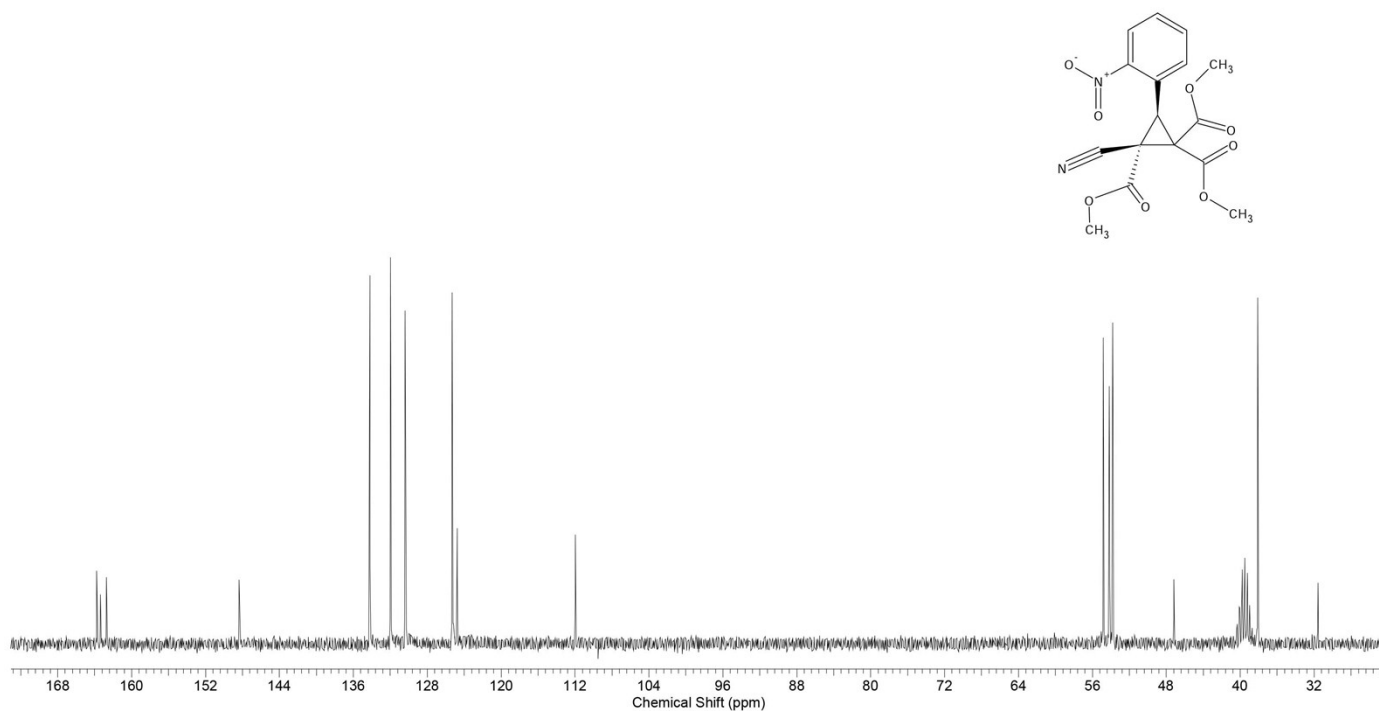

| No. | (ppm)  | Height | No. | (ppm)  | Height |
|-----|--------|--------|-----|--------|--------|
| 1   | 31.59  | 0.1579 | 9   | 125.29 | 0.9088 |
| 2   | 38.08  | 0.8955 | 10  | 130.38 | 0.8629 |
| 3   | 47.17  | 0.1670 | 11  | 131.98 | 1.0000 |
| 4   | 53.79  | 0.8312 | 12  | 134.22 | 0.9534 |
| 5   | 54.17  | 0.6666 | 13  | 148.37 | 0.1658 |
| 6   | 54.83  | 0.7930 | 14  | 162.73 | 0.1722 |
| 7   | 111.97 | 0.2820 | 15  | 163.36 | 0.1282 |
| 8   | 124.76 | 0.2993 | 16  | 163.77 | 0.1890 |

# <sup>1</sup>H NMR for 4j

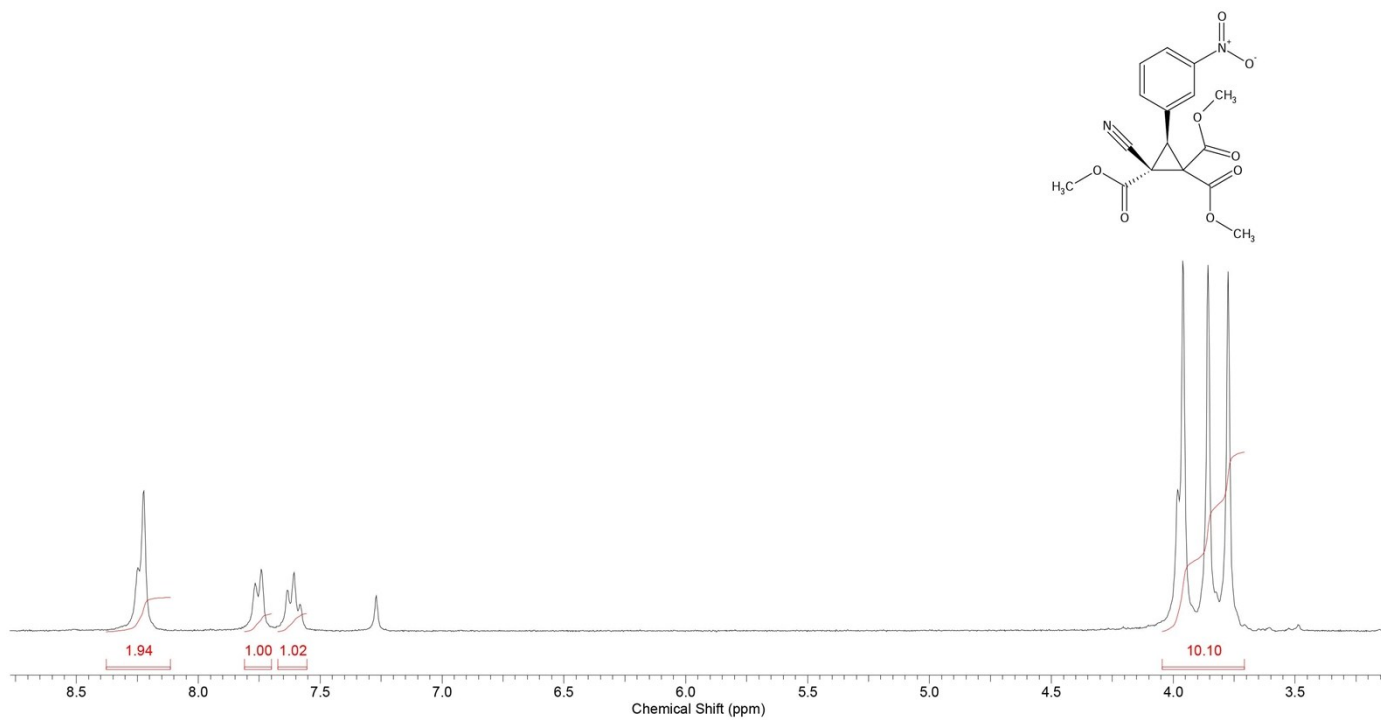

# <sup>13</sup>C NMR for 4j

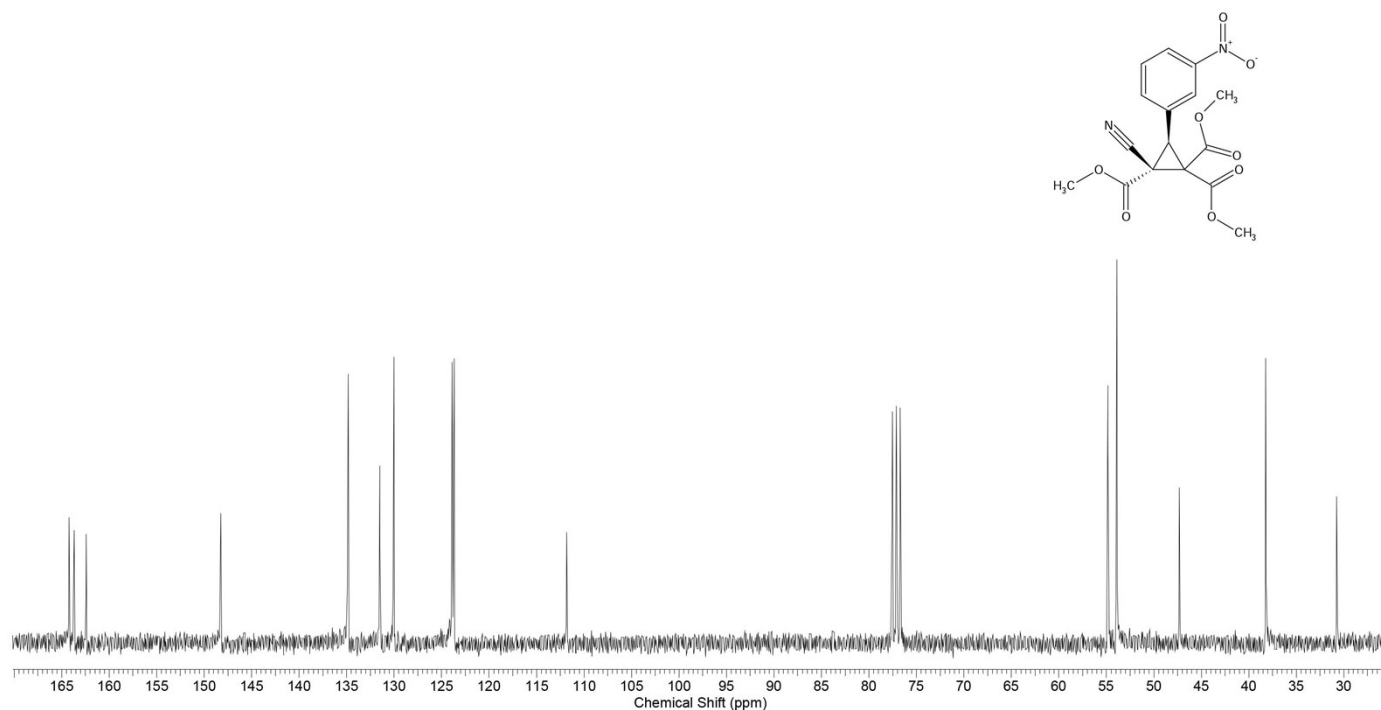

| No. | (ppm)  | Height | No. | (ppm)  | Height |
|-----|--------|--------|-----|--------|--------|
| 1   | 30.74  | 0.3824 | 9   | 130.03 | 0.7471 |
| 2   | 38.22  | 0.7428 | 10  | 131.52 | 0.4626 |
| 3   | 47.31  | 0.4065 | 11  | 134.85 | 0.7026 |
| 4   | 53.92  | 1.0000 | 12  | 148.27 | 0.3394 |
| 5   | 54.84  | 0.6723 | 13  | 162.40 | 0.2850 |
| 6   | 111.82 | 0.2893 | 14  | 163.69 | 0.2943 |
| 7   | 123.68 | 0.7426 | 15  | 164.21 | 0.3277 |
| 8   | 123.87 | 0.7333 |     |        |        |

### $^1\text{H}$ NMR for **4k**

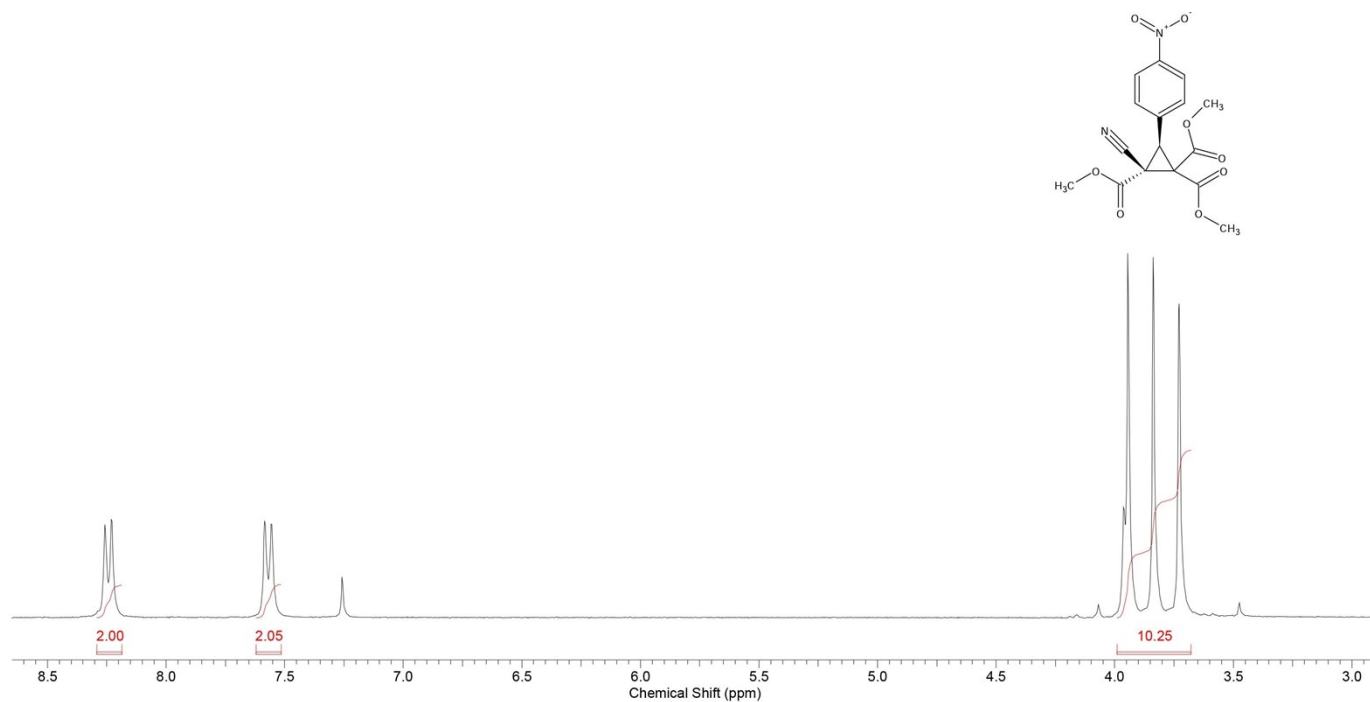

### $^{13}\text{C}$ NMR for **4k**

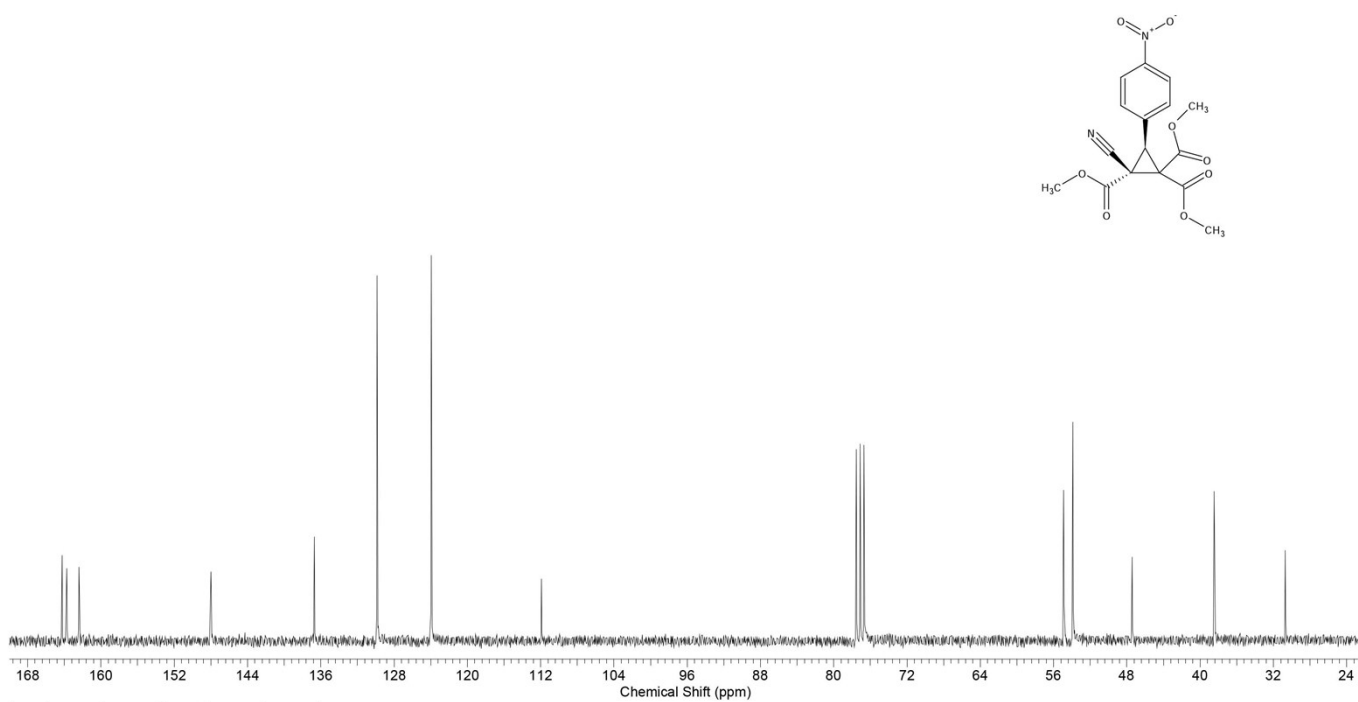

| No. | (ppm)  | Height | No. | (ppm)  | Height |
|-----|--------|--------|-----|--------|--------|
| 1   | 30.71  | 0.2347 | 8   | 129.85 | 0.9478 |
| 2   | 38.46  | 0.3883 | 9   | 136.69 | 0.2703 |
| 3   | 47.44  | 0.2171 | 10  | 147.97 | 0.1797 |
| 4   | 53.91  | 0.5684 | 11  | 162.40 | 0.1914 |
| 5   | 54.90  | 0.3909 | 12  | 163.74 | 0.1881 |
| 6   | 111.92 | 0.1607 | 13  | 164.25 | 0.2224 |
| 7   | 123.94 | 1.0000 |     |        |        |

# <sup>1</sup>H NMR for 4m

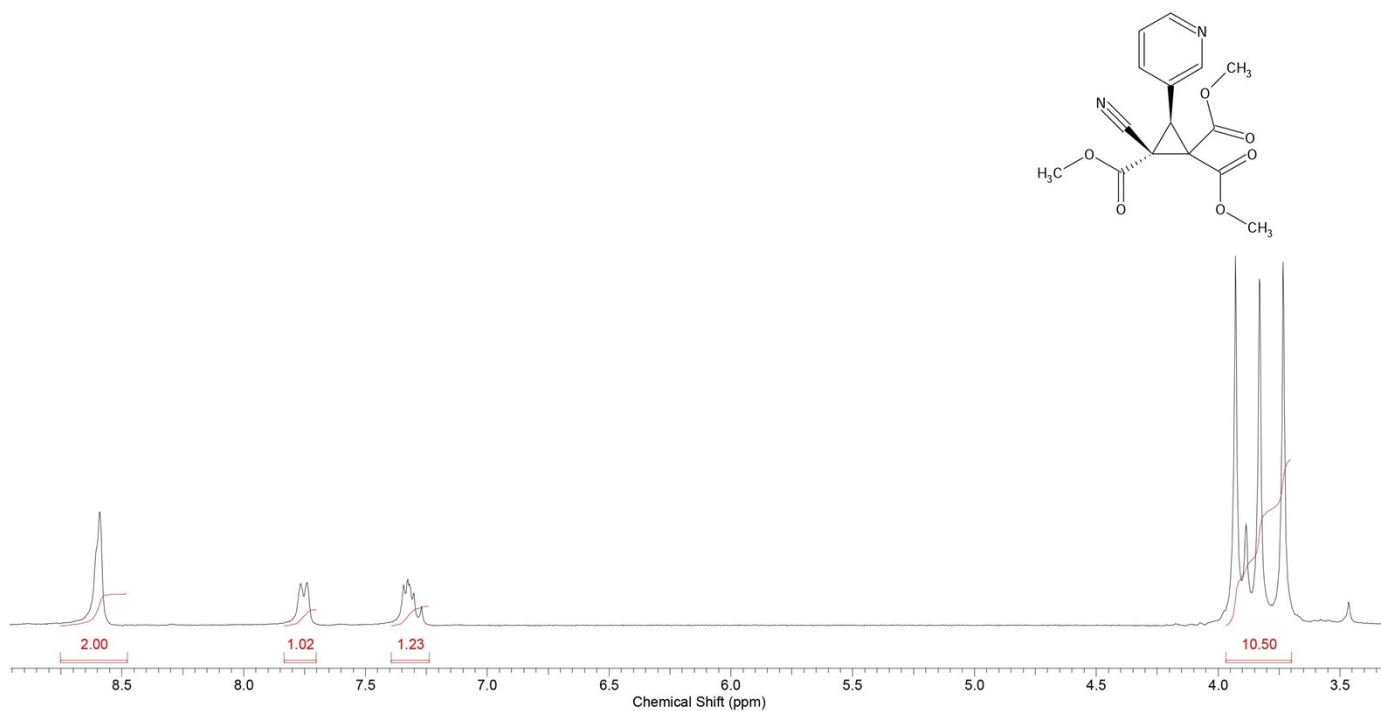

# <sup>13</sup>C NMR for 4m

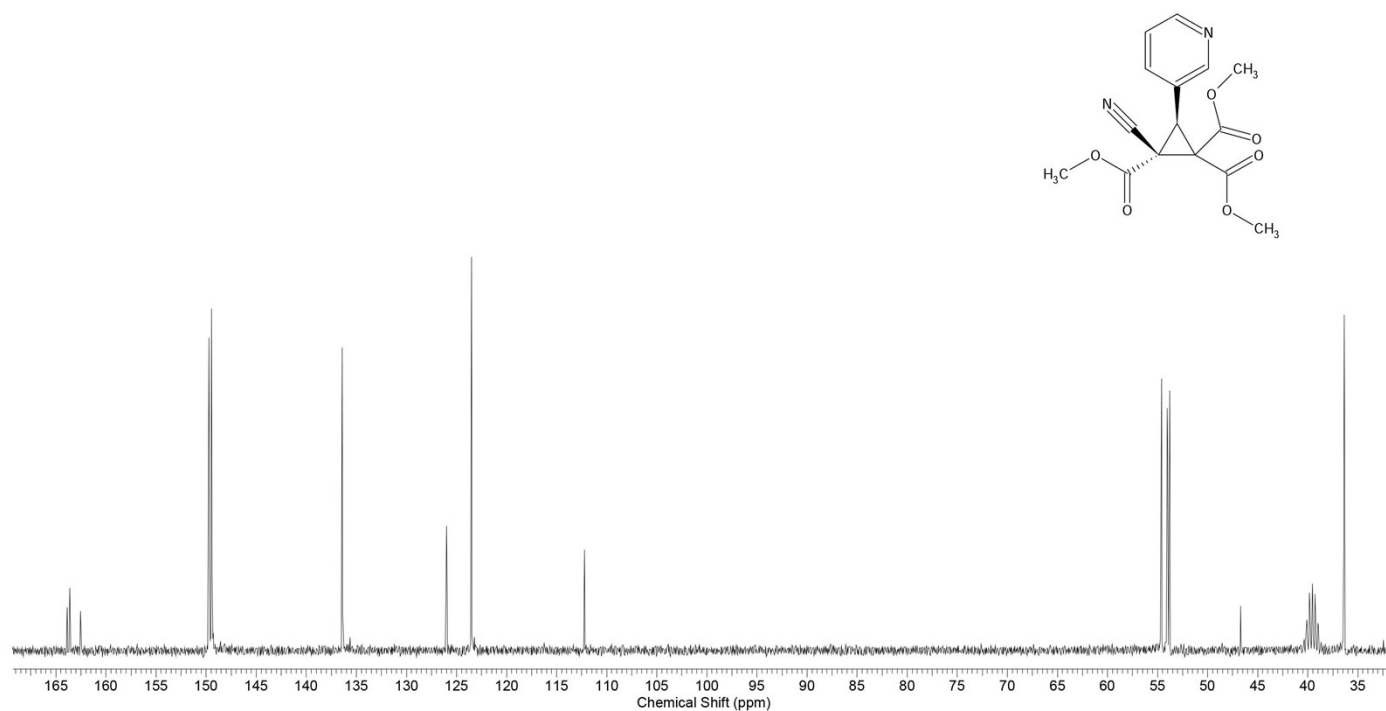

| No. | (ppm)  | Height | No. | (ppm)  | Height |
|-----|--------|--------|-----|--------|--------|
| 1   | 30.67  | 0.0918 | 9   | 125.97 | 0.3172 |
| 2   | 36.37  | 0.8528 | 10  | 136.40 | 0.7700 |
| 3   | 46.71  | 0.1129 | 11  | 149.46 | 0.8692 |
| 4   | 53.80  | 0.6615 | 12  | 149.72 | 0.7948 |
| 5   | 54.02  | 0.6164 | 13  | 162.53 | 0.1005 |
| 6   | 54.61  | 0.6913 | 14  | 163.62 | 0.1585 |
| 7   | 112.23 | 0.2559 | 15  | 163.87 | 0.1096 |
| 8   | 123.51 | 1.0000 |     |        |        |
